# Supplementary material
Source: PubMed Central journal article supplement (PMC5713895)

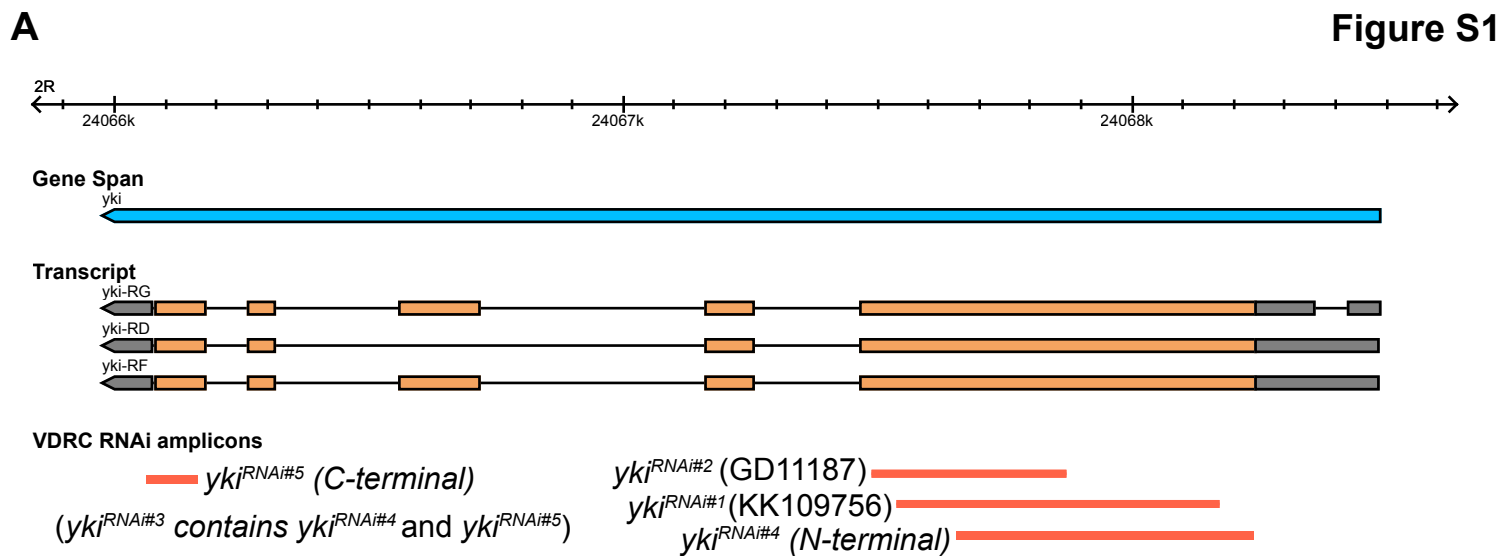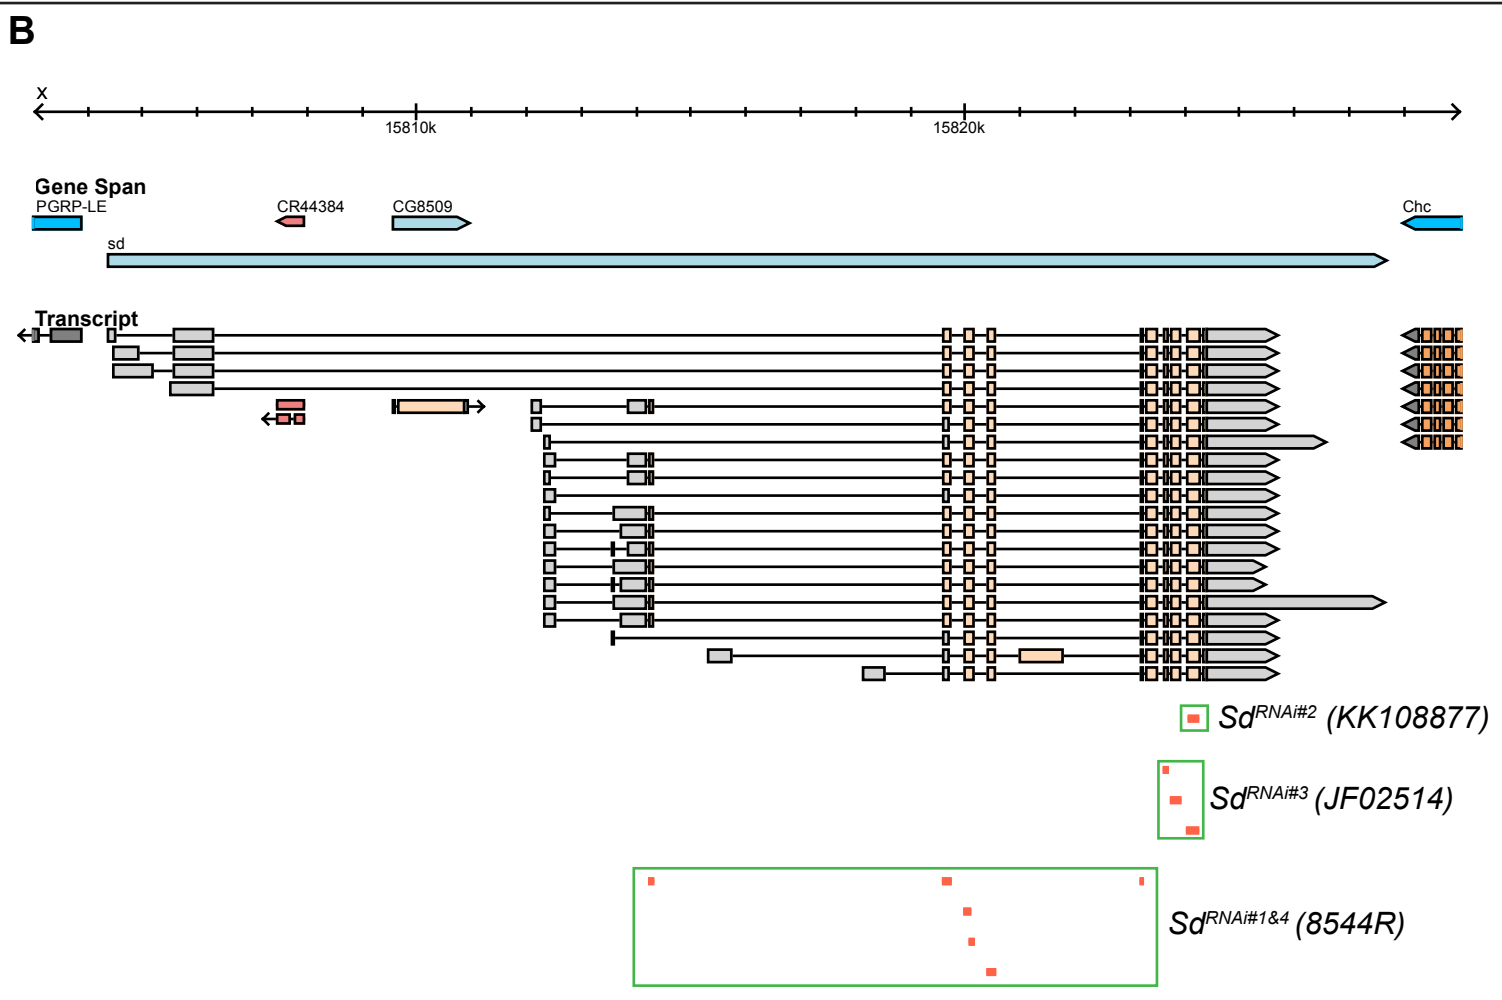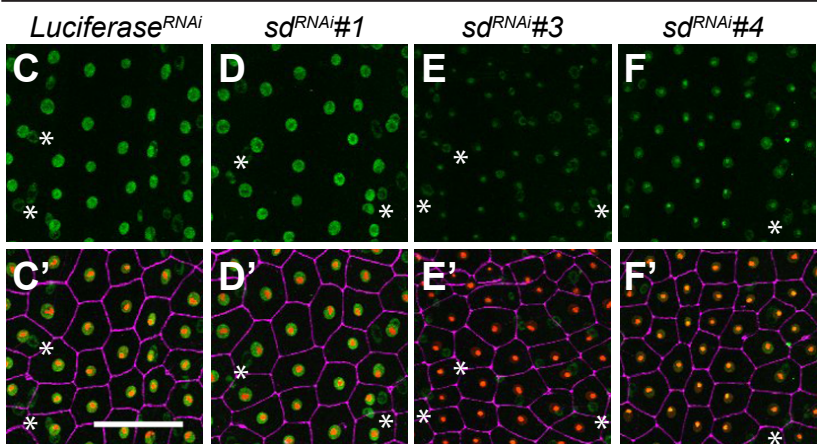

$\alpha$ -Fasciclin III  
 dsRed2 (nuc)  
 $\alpha$ -Scalloped

**Figure S2**

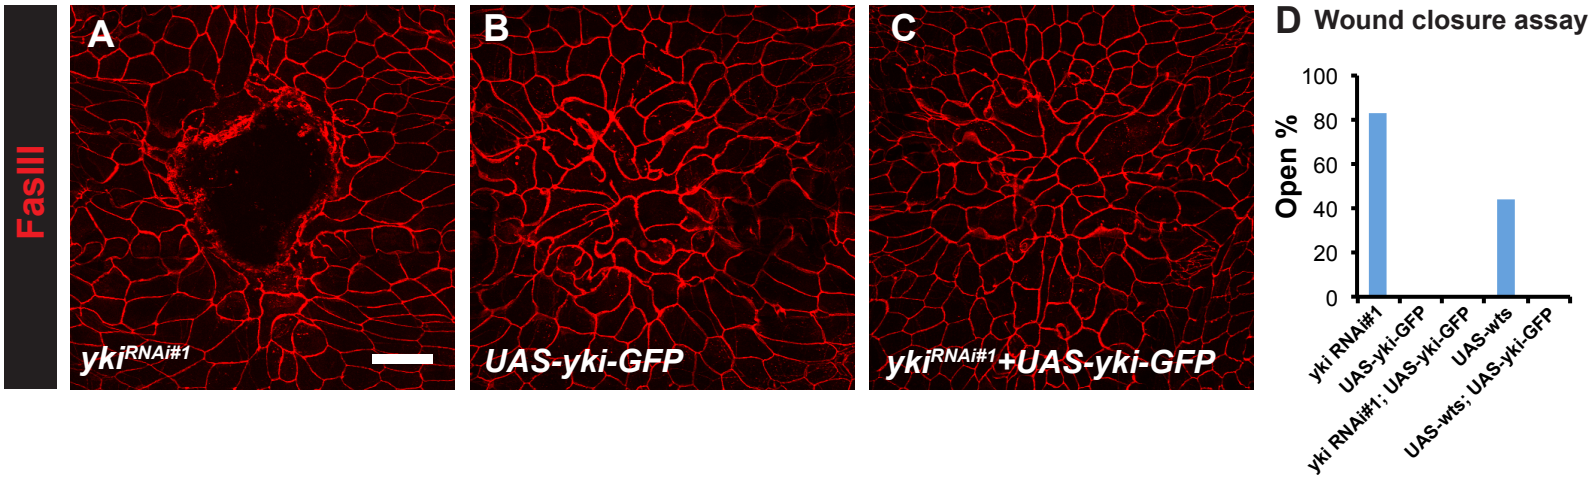

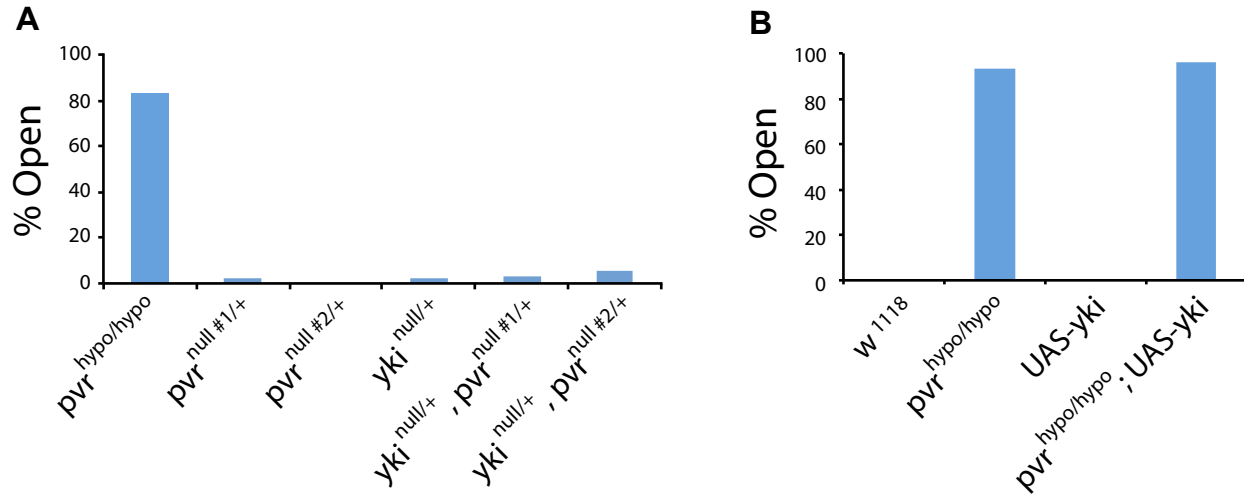

*puc-LacZ*

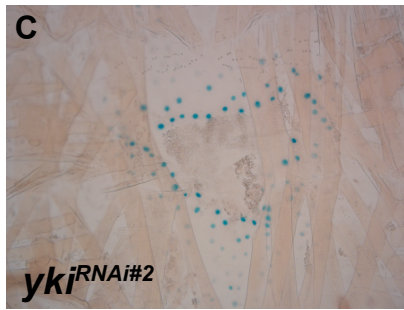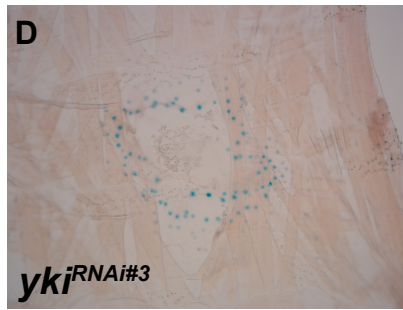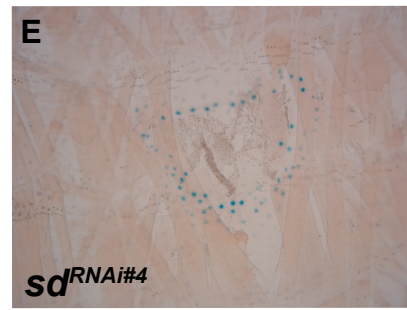

Figure S4

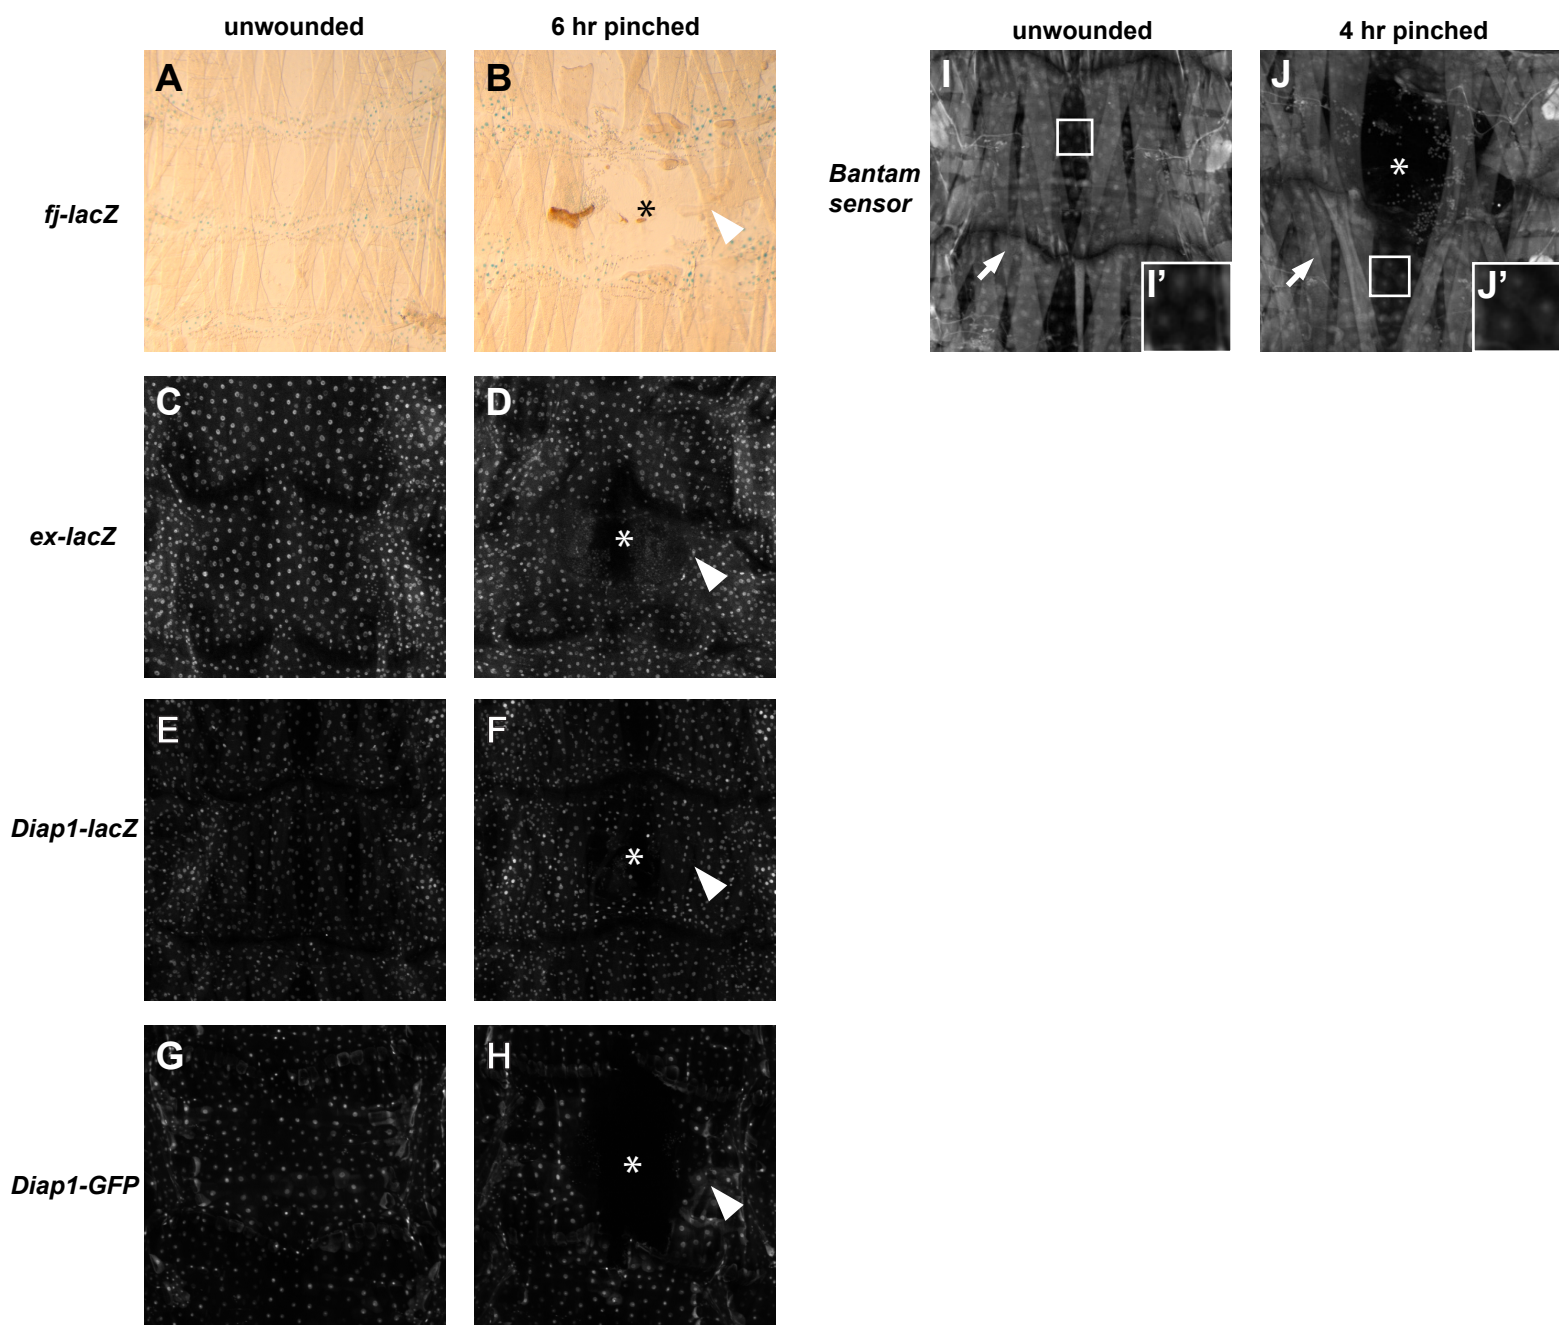

No UV

24 hrs after UV damage

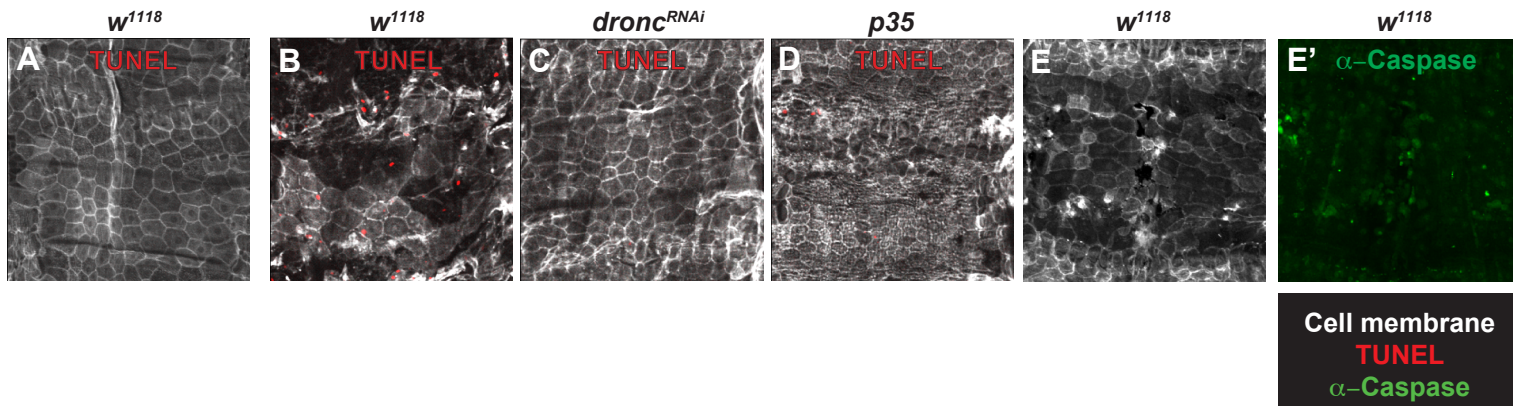

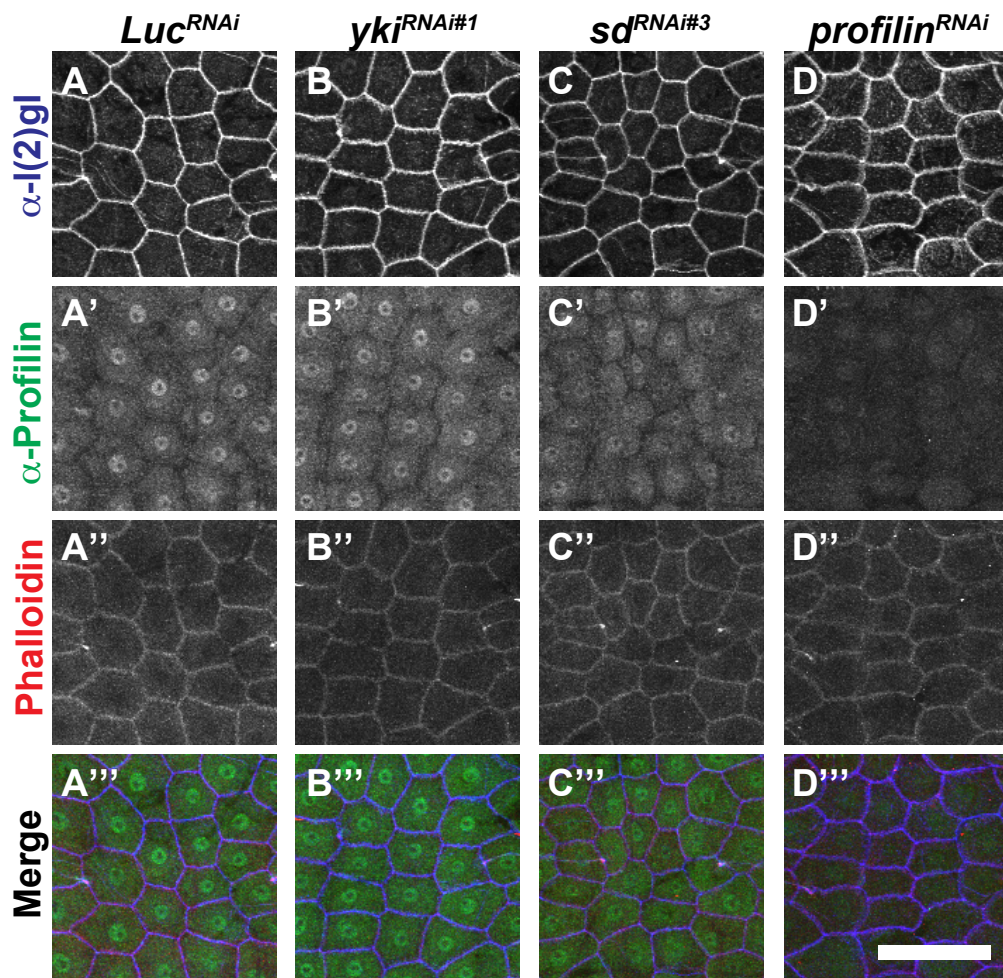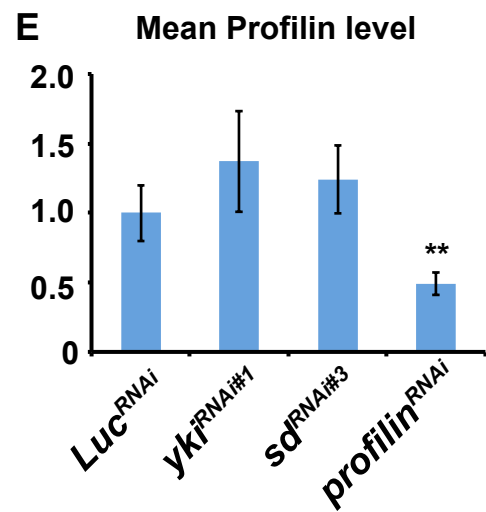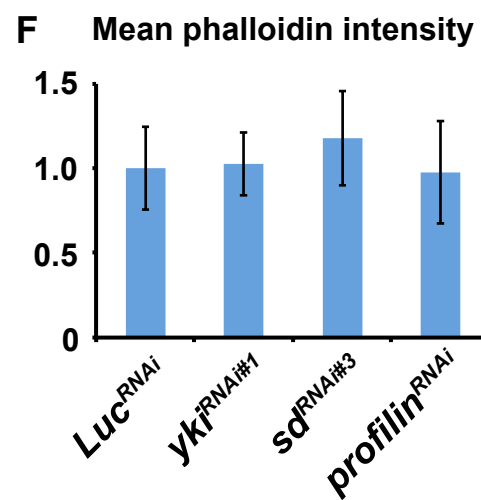

Supplement: NIHMS918667-supplement-Supplemental.pdf [file NIHMS918667-supplement-Supplemental.pdf]
